# Supplementary material
Source: PubMed Central journal article supplement (PMC3316905)
Supplement: supp_fj.11-201442_11-201442SuppFigS1.pdf [file supp_fj.11-201442_11-201442SuppFigS1.pdf]

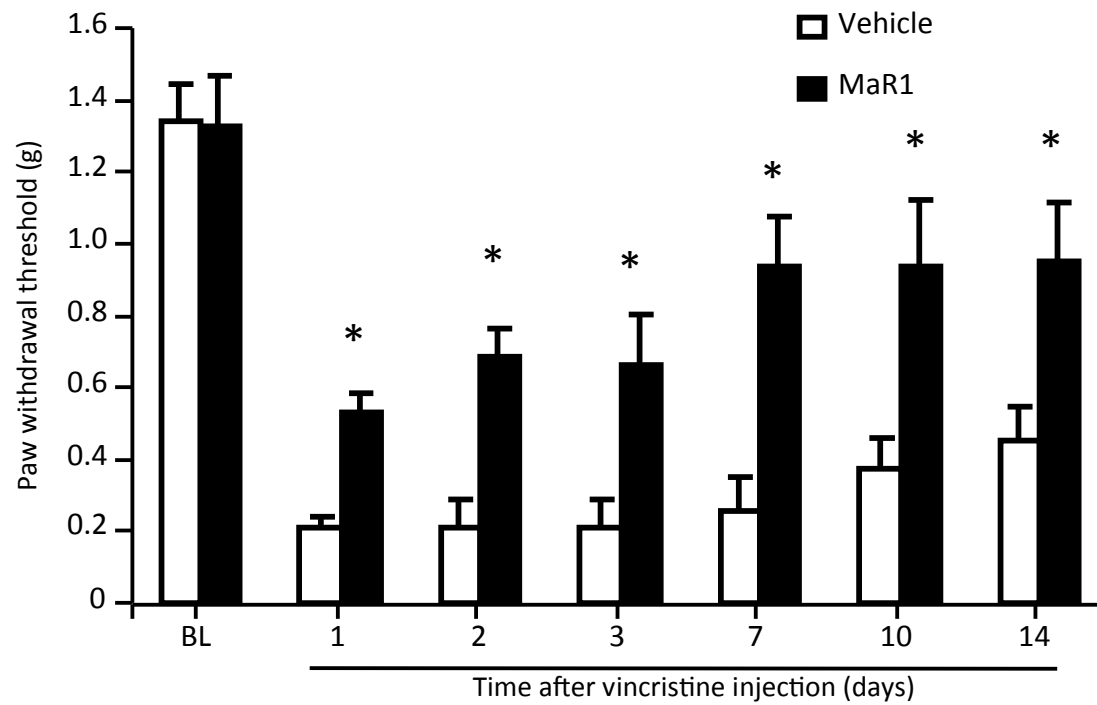

Supplemental Figure S1. MaR1 reduces chemotherapy-induced neuropathic pain.

Time course of vincristine-induced mechanical allodynia at baseline (BL) and in vehicle (PBS) versus MaR1 (40 ng, i.p) treated mice. \*P<0.05, versus vehicle, n=10 (vehicle), and n=5 (MaR1). All results are mean ± SEM.
